# Supplementary material
Source: ML conference proceedings conference paper supplement (https://openreview.net/forum?id=xhtqgW5b93)
Supplement: supplementary_material [file attachment]

## A DETAILS ABOUT FACILITY LOCATION OPTIMIZATION

### A.1 GAIN FUNCTION COMPUTATION IN FL

In the greedy algorithm we select the token  $v^*$  from  $V \setminus A$  that maximizes the following gain function:

$$v^* = \arg \max_{v \in (V-A)} f(v|A)$$

where  $f(v|A)$  is defined as:

$$\begin{aligned} f(v^*|A) &= f(\{v^*\} \cup A) - f(A) \\ &= \sum_{v \in V} \max_{v' \in (\{v^*\} \cup A)} \text{sim}(v, v') - \sum_{v \in V} \max_{v'' \in A} \text{sim}(v, v'') \end{aligned}$$

Since for each  $v \in V$ , find the maximum corresponding  $v'$  in the updated representatative set  $\{v^*\} \cup A$  is equivalent to compare  $v'$  in  $A$  and  $v^*$ , namely:

$$\sum_{v \in V} \max_{v' \in (\{v^*\} \cup A)} \text{sim}(v, v') = \sum_{v \in V} \max \left[ \left( \max_{v' \in A} \text{sim}(v, v'), \text{sim}(v, v^*) \right) \right]$$

Therefore

$$\begin{aligned} f(v^*|A) &= \sum_{v \in V} \max \left[ \left( \max_{v' \in A} \text{sim}(v, v'), \text{sim}(v, v^*) \right) \right] - \sum_{v \in V} \max_{v'' \in A} \text{sim}(v, v'') \\ &= \sum_{v \in V} \max \left[ \left( \max_{v' \in A} \text{sim}(v, v'), \text{sim}(v, v^*) \right) - \max_{v'' \in A} \text{sim}(v, v'') \right] \\ &= \sum_{v \in V} \max \left( 0, \text{sim}(v, v^*) - \max_{v'' \in A} \text{sim}(v, v'') \right) \end{aligned}$$

Eventually,

$$v^* = \arg \max_{v' \in (V-A)} \sum_{v \in V} \max \left( 0, \text{sim}(v', v^*) - \max_{v'' \in A} \text{sim}(v, v'') \right)$$

## A.2 FACILITY LOCATION OPTIMIZATION ALGORITHM

**Algorithm 2:** Facility Location Token Selection Algorithm**Input:** Similarity matrix  $S \in \mathbb{R}^{N \times N}$ , number of tokens to select  $D$ **Output:** Selected token indices  $T$ **Initialize:**  $T \leftarrow \{\}$ ;**for**  $i = 1$  **to**  $N$  **do**    Compute row sums:  $s_i = \sum_{j=1}^N S_{i,j}$ ;**end**Select the first token:  $t_1 \leftarrow \arg \max_i s_i$ ;Add  $t_1$  to  $T$ :  $T \leftarrow T \cup \{t_1\}$ ;Initialize the largest row:  $c \leftarrow S_{t_1}$ ;Set  $S_{t_1} \leftarrow 0$ ;**for**  $k = 2$  **to**  $D$  **do**    **for each token**  $i$  **not in**  $T$  **do**        Compute gain:  $g_i = \sum_{j=1}^N \max(0, S_{i,j} - c_j)$ ;    **end**    Select next token:  $t_k \leftarrow \arg \max_{i \notin T} g_i$ ;    Add  $t_k$  to  $T$ :  $T \leftarrow T \cup \{t_k\}$ ;    Update largest row:  $c_j \leftarrow \max(c_j, S_{t_k,j})$  for all  $j = 1$  to  $N$ ;    Set  $S_{t_k} \leftarrow 0$ ;**end****return**  $T$



## B OVERALL DETAILED ALGORITHM OF TOMA

---

### Algorithm 3: ToMA with local regions

---

**Input:** Tensor  $\mathbf{X} \in \mathbb{R}^{B \times N \times d}$  (input tensor),  $D$  (number of destinations),  $\tau$  (attention temperature),  $F$  (computational layer)

- 1  $\mathbf{X} \leftarrow (\mathbf{X}_1, \dots, \mathbf{X}_P)$ ; /\* Reorganize  $\mathbf{X}$  as local regions \*/
- where  $\mathbf{X}_p \in \mathbb{R}^{B \times N_{local} \times d}$  for  $p = 1 \dots P$  and  $N_{local} \times P = N$ ;
- 2  $D_{local} \leftarrow D/P$ ;  $\mathbf{X} \leftarrow \mathbf{X}.reshape(B \times P, N_{local}, d)$ ;
- Step 1: Facility Location**
- 3 GPU Greedy to get:  $(T_1, T_2, \dots, T_{B \times P}) \leftarrow \text{Greedy}(f_{FL}, D_{local}, \mathbf{X})$ ;
- 4 Gather  $\mathbf{X}_T \leftarrow (\mathbf{X}_{1,T_1}, \mathbf{X}_{2,T_2}, \dots, \mathbf{X}_{B \times P, T_{B \times P}})$ ; /\* Shape:  $B \times P, D_{local}, d$  \*/
- Step 2: Merge**
- 5  $\mathbf{A} \leftarrow \text{SDPA}(\mathbf{X}_T, \mathbf{X}, \mathbf{I}, \tau)$ ; /\* Shape:  $B \times P, D_{local}, N_{local}$  \*/
- 6  $\tilde{\mathbf{A}} \leftarrow \mathbf{A} / \mathbf{A}.\text{sum}(-1)$ ; /\* Normalize each row \*/
- 7  $\mathbf{X}_{merged} \leftarrow \tilde{\mathbf{A}} \mathbf{X}$ ; /\* Apply Merge, Shape:  $B \times P, D_{local}, d$  \*/
- Computational Layer:**
- 8  $\mathbf{X}' \leftarrow F(\mathbf{X}_{merged}.reshape(B, D, d))$ ;
- Step 3: Unmerge**
- 9  $\mathbf{X}'_{unmerged} \leftarrow \tilde{\mathbf{A}}^\top \mathbf{X}'$ ;
- 10 Group  $\mathbf{X}'_{unmerged}$  back to reverse the local region split;
- 11 **return**  $\mathbf{X}'_{unmerged}$

---

## C MORE ABLATION RESULTS

### C.0.1 UNMERGE COMPARISON (TRANSPOSE VS PSEUDO-INVERSE)

| Unmerge method        | CLIP           | DINO          | MSE              | Time (s)    |
|-----------------------|----------------|---------------|------------------|-------------|
| <b>transpose</b>      | <b>31.0273</b> | <b>0.0569</b> | 1296.3734        | <b>4.75</b> |
| <b>pseudo-inverse</b> | 30.9972        | 0.0571        | <b>1288.2609</b> | 10.07       |

Table 6: Comparison of unmerge methods (transpose vs. pseudo-inverse) under the condition: 50 recompute steps, ratio=0.5, global attention (globalAttn)

From Tab. 6 we find the difference between transpose and pseudo-inverse method of unmerge shows similar outcome in scores while transpose is significantly faster than pseudo-inverse, we then set transpose as our default setting.

### C.0.2 SCHEDULE

In this section, we compare the metric of different sharing schedules of destination selections and attention weights computation

| Dst steps      | Attn steps     | CLIP           | DINO          | MSE              |
|----------------|----------------|----------------|---------------|------------------|
| first step     | first step     | 30.0429        | 0.0773        | 2488.5682        |
| every 10 steps | every 10 steps | 30.8171        | 0.0729        | 1735.4429        |
| every 10 steps | every 5 steps  | 30.8652        | 0.0699        | 1632.3441        |
| every 10 steps | every 1 step   | <b>30.9971</b> | <b>0.0668</b> | <b>1524.6436</b> |
| every 5 steps  | every 5 steps  | 30.8923        | 0.0692        | 1608.6099        |
| every 1 step   | every 1 step   | 30.9196        | 0.0668        | 1551.5814        |

Table 7: Recompute schedule comparison with CLIP, DINO, and MSE metrics

From Tab. 7 we observe that recomputing attention and destination (Dst) steps more frequently generally results in slightly improved performance across the CLIP, DINO, and MSE metrics. Specifically, recomputing attention every step yields the best scores in all metrics, while less frequent recomputation (e.g., every 10 steps) results in slightly worse scores but still competitive results. The difference between recomputation frequencies becomes more noticeable in the MSE metric, where recomputing more frequently leads to lower error values. We select a recomputation schedule of computing attention every 5 steps and destination every 10 steps because this provides nearly similar performance to the most frequent recomputation (every step) while likely being faster due to reduced computation overhead. This approach strikes a good balance between performance and efficiency.

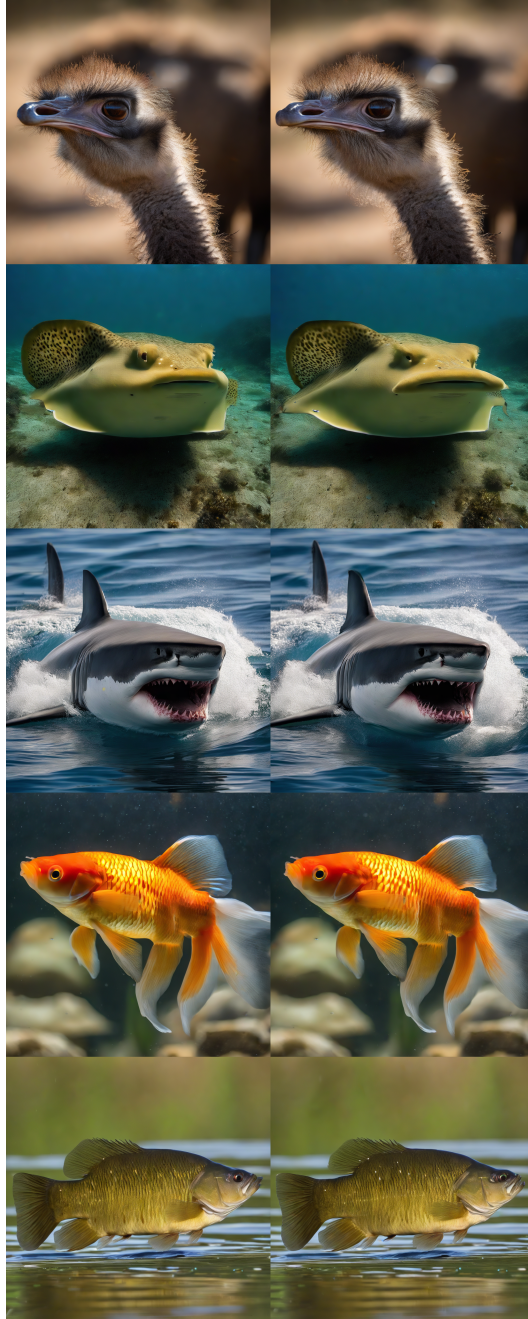

Figure 7: Comparison of pseudo-inverse and transpose

## D THEORETICAL COMPLEXITY

We keep necessary constants for the complexity estimate as they are essential factors in practical speedup calculation. Also, we count the total number of multiplications by treating matrix multiplication as multiple dot products, ignoring algorithms with better theoretical complexity. The complexity is  $7d^2N + 2dN^2$  for a self-attention block. After using token merge, the complexity is:  $(7d^2D + 2dD^2)$  as we reduce the input size from  $N$  to  $D$ . We also define  $r := D/N$  as the reduction ratio. Thus, the speedup in terms of the reduction ratio is  $\text{Speedup} = \frac{7d+2N}{7d \cdot r + 2N \cdot r^2}$ .

The overhead of submodular optimization is:  $N^2d$

The overhead of computing merge attention projection is:  $NDd + Nd$

The overhead of merge is:  $NDd$

The overhead of unmerge with transpose is:  $NDd$

## E DETAILED RESULTS ON GEMREC & IMAGENET1K

| Method        | Ratio | FID    | CLIP | DINO | MSE     | RTX6000 | V100 | RTX8000 |
|---------------|-------|--------|------|------|---------|---------|------|---------|
| baseline_SDXL | 0     | 25.27  | 0.30 | 0.00 | 0.00    | 6.1     | 14.5 | 16.1    |
| ToMe          | 0.25  | 25.65  | 0.30 | 0.05 | 1716.13 | 8.7     | 15.0 | 16.9    |
|               | 0.5   | 26.73  | 0.30 | 0.07 | 2279.39 | 8.7     | 12.9 | 14.6    |
|               | 0.75  | 41.23  | 0.29 | 0.08 | 2344.87 | 8.2     | 11.2 | 12.4    |
| ToMA strip    | 0.25  | 25.17  | 0.30 | 0.05 | 1604.18 | 5.6     | 12.6 | 14.5    |
|               | 0.5   | 29.11  | 0.30 | 0.07 | 2199.76 | 4.6     | 10.1 | 12.0    |
|               | 0.75  | 89.93  | 0.27 | 0.11 | 3185.34 | 4.5     | 8.0  | 9.5     |
| ToMA tile     | 0.25  | 25.43  | 0.30 | 0.05 | 1348.64 | 6.2     | 13.6 | 15.7    |
|               | 0.5   | 29.19  | 0.30 | 0.06 | 1912.22 | 6.3     | 11.1 | 13.2    |
|               | 0.75  | 58.90  | 0.28 | 0.09 | 2802.32 | 6.2     | 9.1  | 10.7    |
| ToMA *        | 0.25  | 26.31  | 0.30 | 0.05 | 1866.68 | 5.5     | 12.3 | 13.5    |
|               | 0.5   | 38.14  | 0.29 | 0.08 | 3451.15 | 4.9     | 9.7  | 11.5    |
|               | 0.75  | 123.37 | 0.25 | 0.11 | 5440.23 | 4.9     | 7.6  | 8.9     |
| ToMA          | 0.25  | 25.72  | 0.30 | 0.05 | 1432.56 | 6.0     | 14.3 | 15.9    |
|               | 0.5   | 28.88  | 0.30 | 0.07 | 2012.13 | 5.0     | 11.0 | 12.8    |
|               | 0.75  | 58.59  | 0.28 | 0.10 | 2785.68 | 4.3     | 8.5  | 9.8     |
| LTB           | 0.25  | —      | —    | —    | —       | 5.2     | 12.1 | 3.1     |
|               | 0.5   | —      | —    | —    | —       | 4.0     | 9.9  | 7.8     |
|               | 0.75  | —      | —    | —    | —       | 3.1     | 8.3  | 6.5     |

Table 8: Comparison of different methods with respect to FID, CLIP, DINO, MSE, and various GPU performance metrics (RTX6000Ada, V100, RTX8000).

## F MORE QUALITATIVE RESULTS

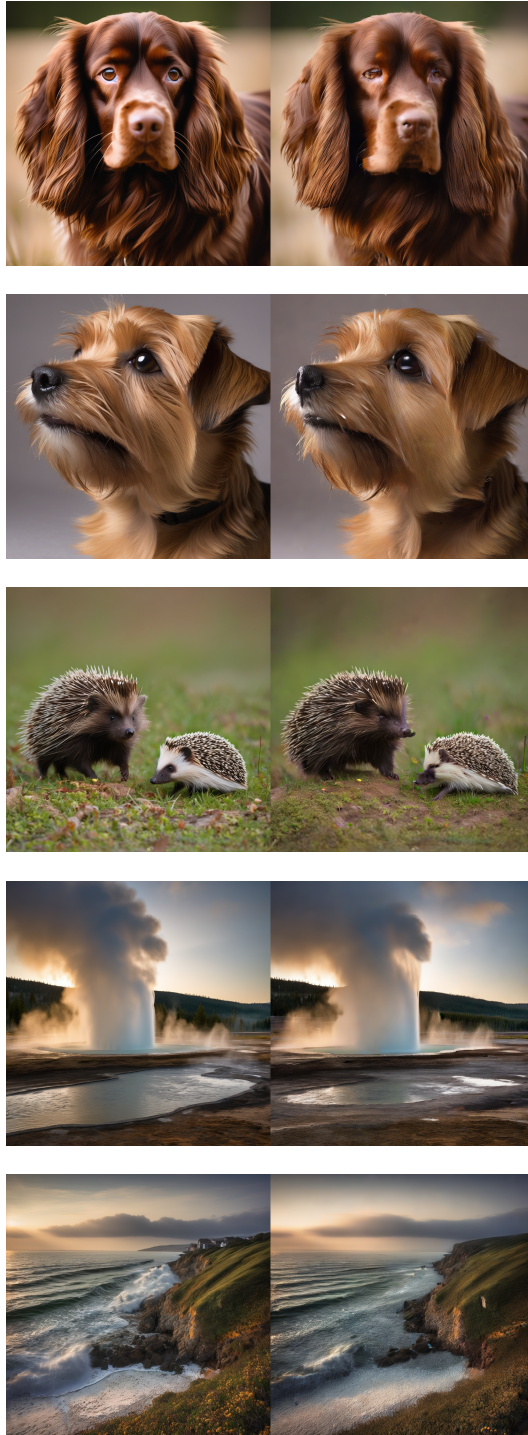

Figure 8: Image Comparison between left: original image generated by SDXL; right: Image generated by ToMA at ratio 0.5



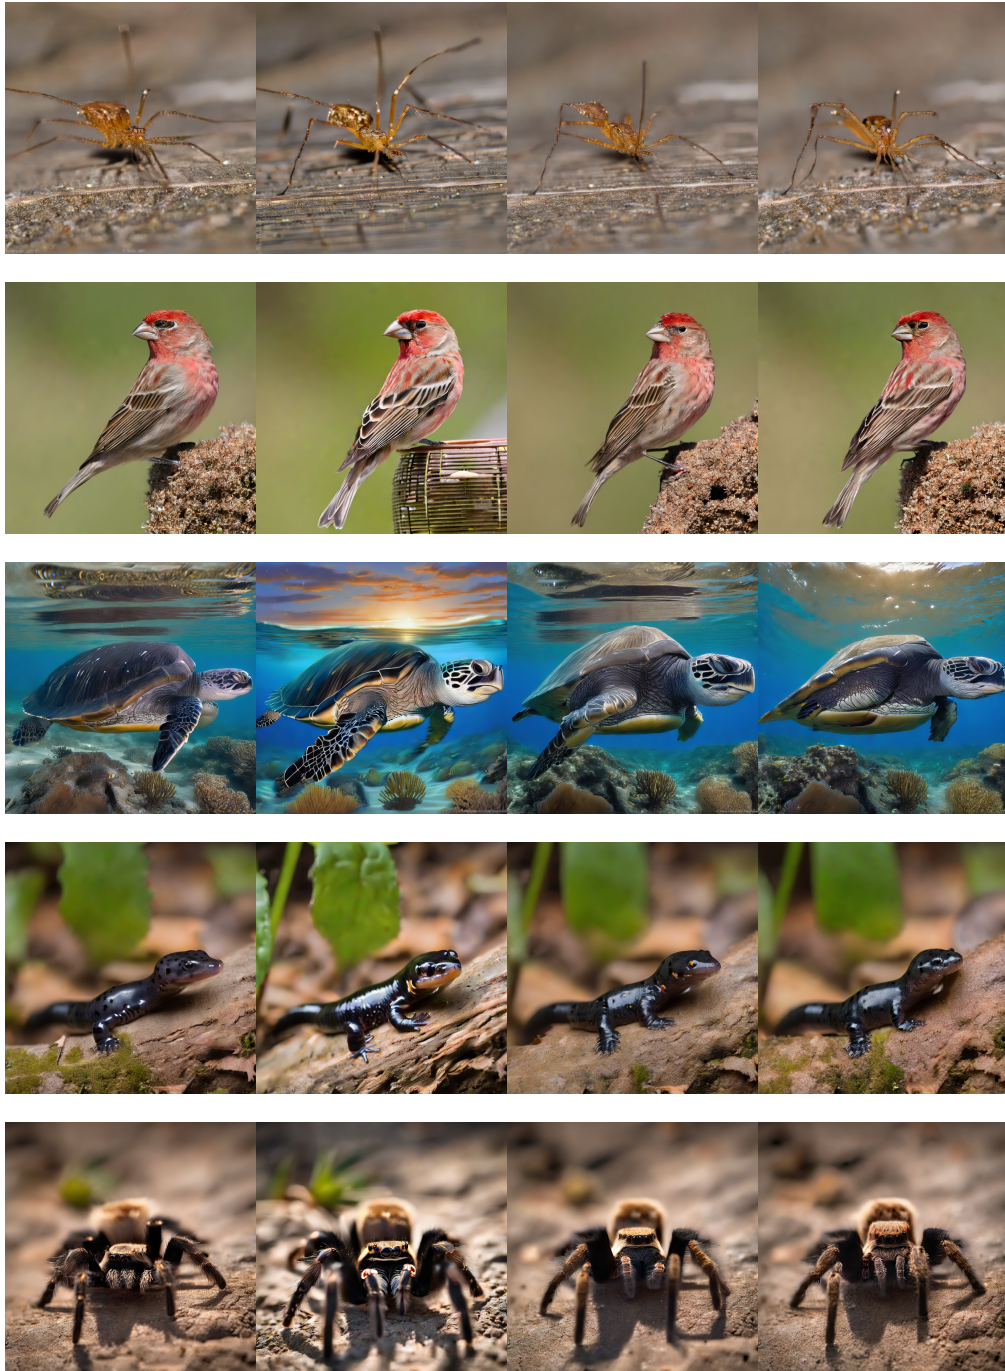

Figure 9: Images generated by different ToMA variances. from left to right: ToMA\_stripe, ToMA, ToMA\_tile, ToMA
